# Supplementary material for: Graphitic Carbon Nitride Nanosheets Decorated with Zinc-Cadmium Sulfide for Type-II Heterojunctions for Photocatalytic Hydrogen Production
Source: MDPI journal article supplement (doi:10.3390/nano13182609), 2023-09-21
Supplement: s1 [file s1]

**Electronic Supporting Information**

**Graphitic Carbon Nitride Nanosheets Decorated Zinc-Cadmium**

**Sulfide Type-II Heterojunctions for Photocatalytic Hydrogen**

**Production**

Ammar Bin Yousaf,<sup>1</sup>† Muhammad Imran,<sup>2</sup>† Muhammad Farooq,<sup>3,\*</sup> Samaira Kausar,<sup>4</sup> Samina  
Yasmeen,<sup>4</sup> and Peter Kasak,<sup>1,\*</sup>

<sup>1</sup> Center for Advanced Materials, Qatar University, Doha 2713, Qatar

<sup>2</sup> Hefei National Laboratory for Physical Sciences at Microscale, University of Science and  
Technology of China, Hefei, Anhui 230026, PR China

<sup>3</sup> Interdisciplinary Graduate School of Science and Technology,, Shinshu University, Ueda  
386-8567, Japan

<sup>4</sup> Department of Chemistry, National Science College, Satellite Town, Gujranwala 52250,  
Pakistan

† : These two authors contributed equally.

\*Corresponding Authors E-mails: [mufaroouk@gmail.com](mailto:mufaroouk@gmail.com), [20hs109g@shinshu-u.ac.jp](mailto:20hs109g@shinshu-u.ac.jp)

(Muhammad Farooq), [peter.kasak@qu.edu.qa](mailto:peter.kasak@qu.edu.qa) (Peter Kasak)

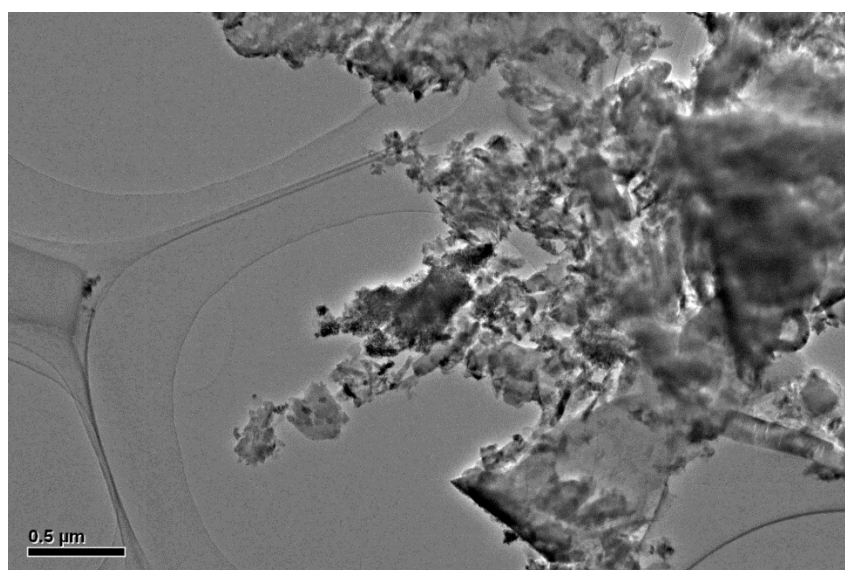

**Figure S1:**Low resolution TEM image of  $g\text{-C}_3\text{N}_4\text{-ZnCdS}$  catalyst.

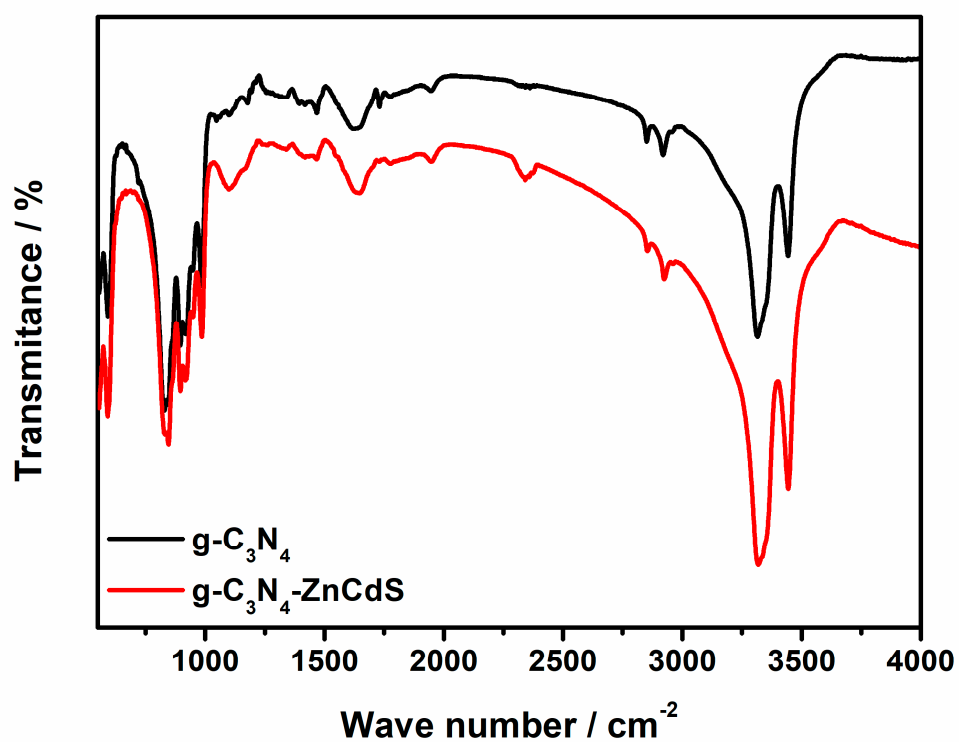

**Figure S2.** Fourier transform infrared (FTIR) spectra of  $g\text{-C}_3\text{N}_4$  (black line) and  $g\text{-C}_3\text{N}_4\text{-ZnCdS}$  (blue line) samples.

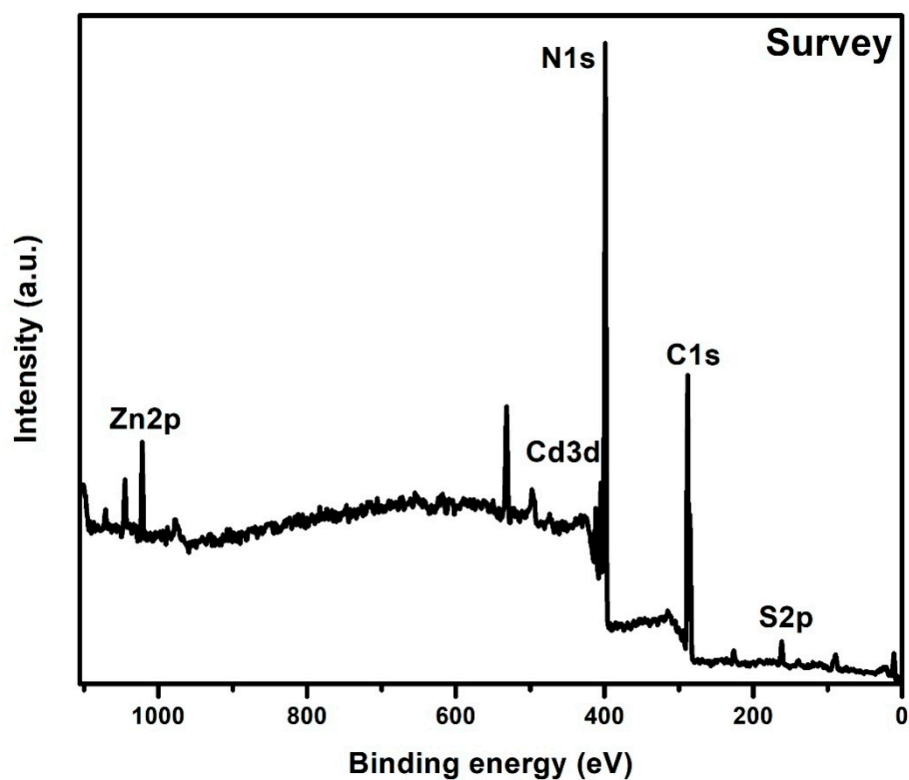

Figure S3: XPS full scan survey for  $g\text{-C}_3\text{N}_4\text{-ZnCdS}$  catalyst.

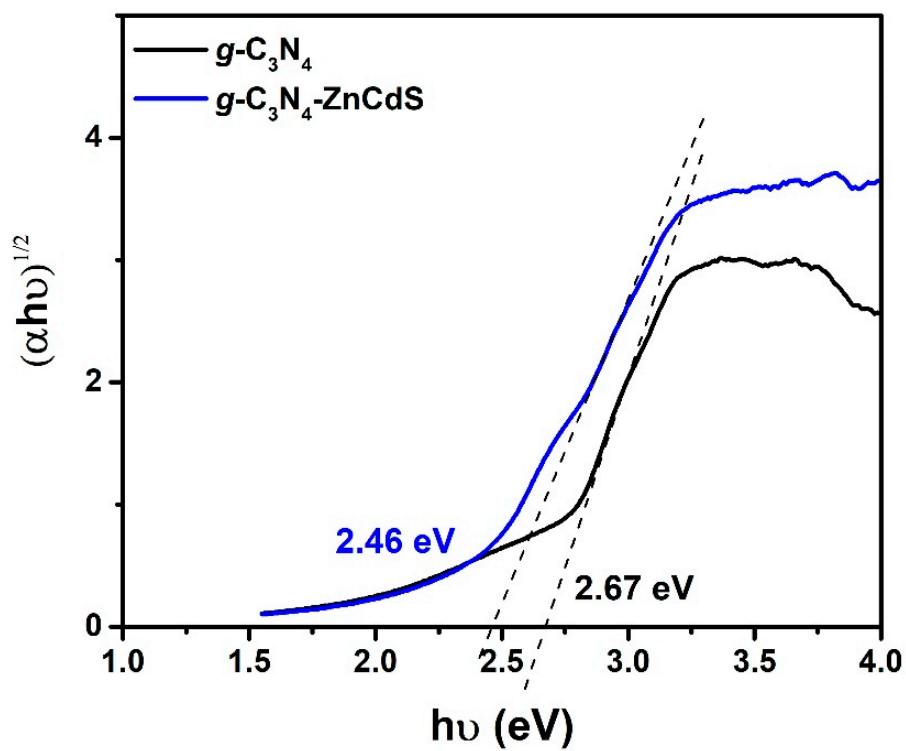

Figure S4: Tauc plot for  $g\text{-C}_3\text{N}_4$  and  $g\text{-C}_3\text{N}_4\text{-ZnCdS}$  heterostructure.

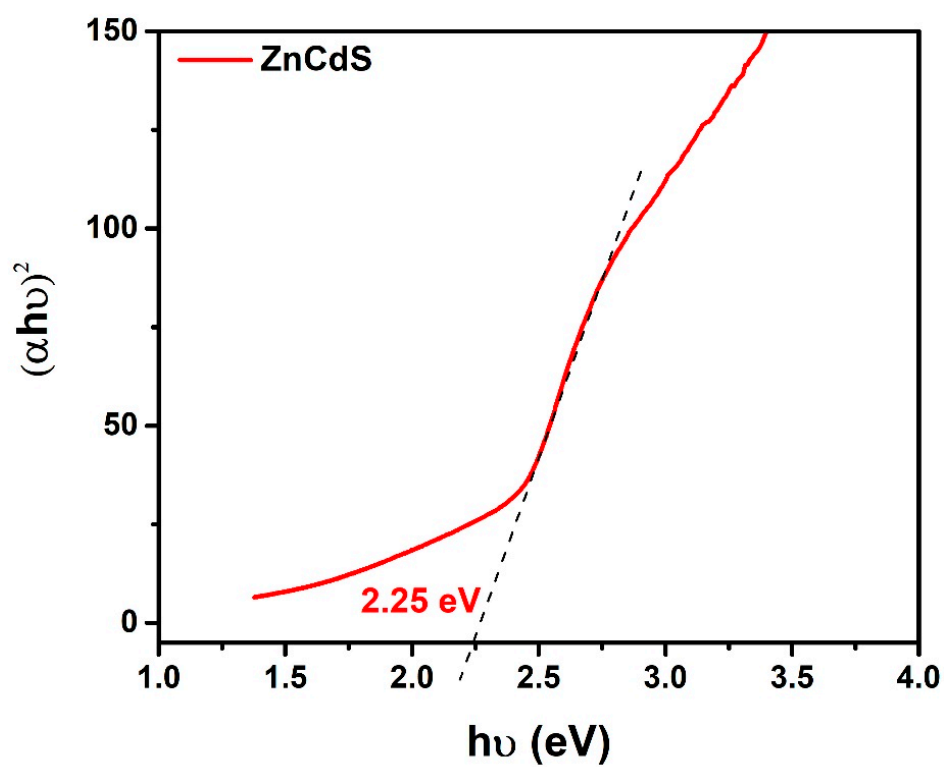

Figure S5: Tauc plot for ZnCdS nanoparticles.

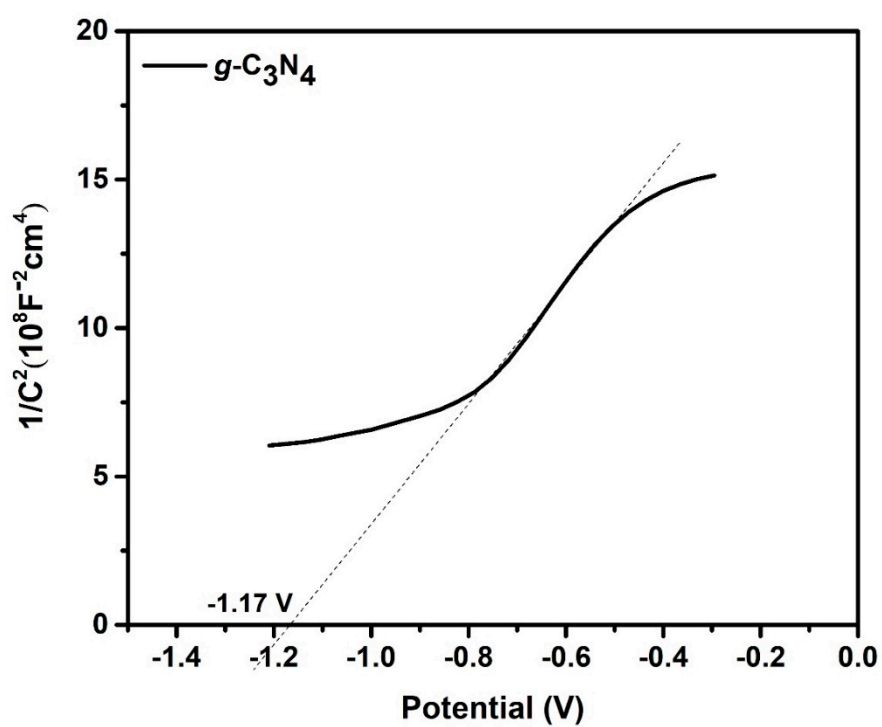

Figure S6: Mott-Schottky plot collected for g-C<sub>3</sub>N<sub>4</sub>.

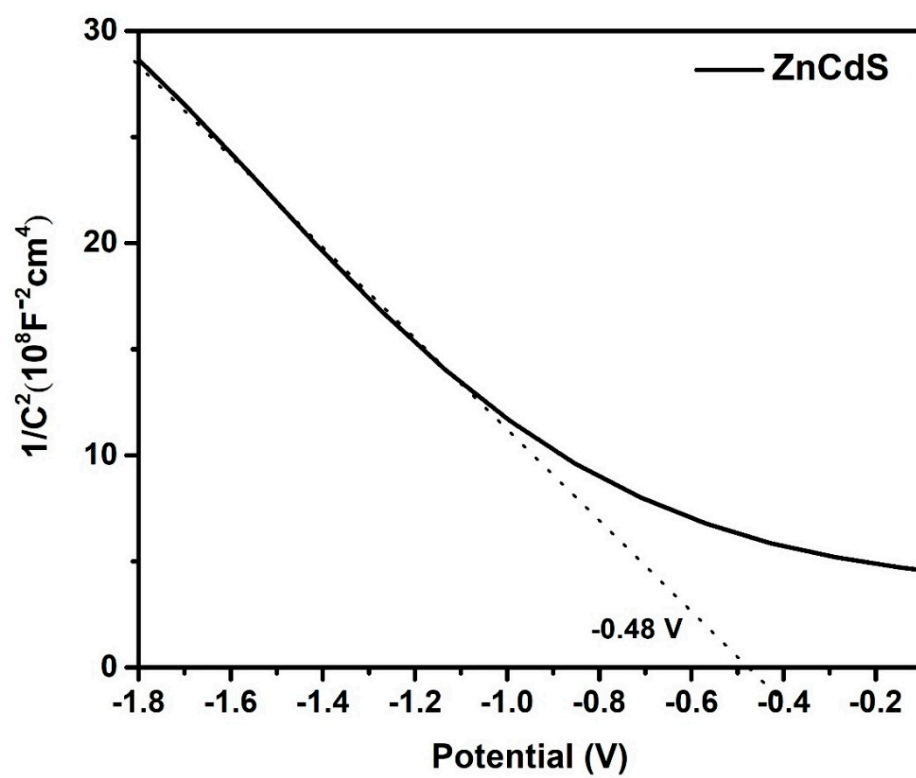

**Figure S7:** Mott-Schottky plot collected for ZnCdS nanoparticles.
